# Supplementary material
Source: Springer Nature journal article supplement (https://www.springermedizin.de/resource/supplementary/12916_2012_695_MOESM2_ESM.pdf/9598554)
Supplement: MOESM2 [file 9598554]

# No. of Studies

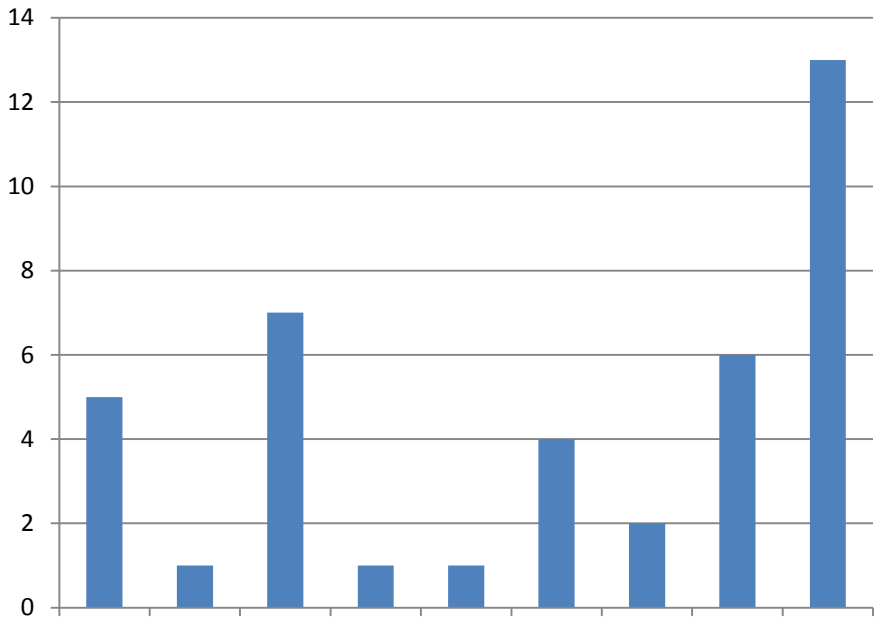

Australia

Austria

Canada

Europe \*

Germany

Netherlands

Norway

United Kingdom

United States

**Country studied**

\* Region
